# Supplementary material for: Evaluating magnetic and thermal effects of various Polymerylated magnetic iron oxide nanoparticles for combined chemo-hyperthermia
Source: Royal Society of Chemistry journal article supplement (doi:10.1039/d1nj05791j), 2022-01-01
Supplement: d1nj05791j1.pdf [file d1nj05791j1.pdf]

## Supplementary Information

### Evaluating magnetic and thermal effects of various Polymerylated magnetic iron oxide nanoparticles for combined chemo-hyperthermia

Kheireddine El-Boubbou,<sup>ab\*</sup> O. Mohamed Lemine,<sup>c</sup> Rizwan Ali,<sup>b</sup> Sarah M. Huwaizi,<sup>b</sup> Sulaiman Al-Humaid,<sup>a</sup> and Abdulmohsen AlKushi<sup>a</sup>

<sup>a</sup>Department of Basic Sciences, College of Science & Health Professions (COSHP), King Saud bin Abdulaziz University for Health Sciences (KSAU-HS), King Abdulaziz Medical City, National Guard Health Affairs, Riyadh 11481, Saudi Arabia

<sup>b</sup>King Abdullah International Medical Research Center (KAIMRC), King Abdulaziz Medical City, National Guard Health Affairs, Riyadh 11426, Saudi Arabia

<sup>c</sup>Department of Physics, College of Sciences, Imam Mohammad Ibn Saud Islamic University (IMSIU), Riyadh 11623, Saudi Arabia

To whom correspondence should be addressed: E-mail: [elboubboukh@ngha.med.sa](mailto:elboubboukh@ngha.med.sa); [boubbouk@ksau-hs.edu.sa](mailto:boubbouk@ksau-hs.edu.sa)

#### **Contents:**

|    |                                                     |    |
|----|-----------------------------------------------------|----|
| 1. | TEM for PMNPs                                       | S2 |
| 2. | TGA for PMNPs                                       | S3 |
| 3. | XRD of PMNPs                                        | S3 |
| 4. | Optical images of Bare-MNPs, PVP-MNPs, and PAA-MNPs | S4 |
| 5. | SAR values of different PMNPs compared to Bare-MNPs | S5 |
| 6. | Characterization of Dox@PVP-MNPs                    | S6 |
| 7. | Hyperthermia cellular-MNP experiments               | S8 |

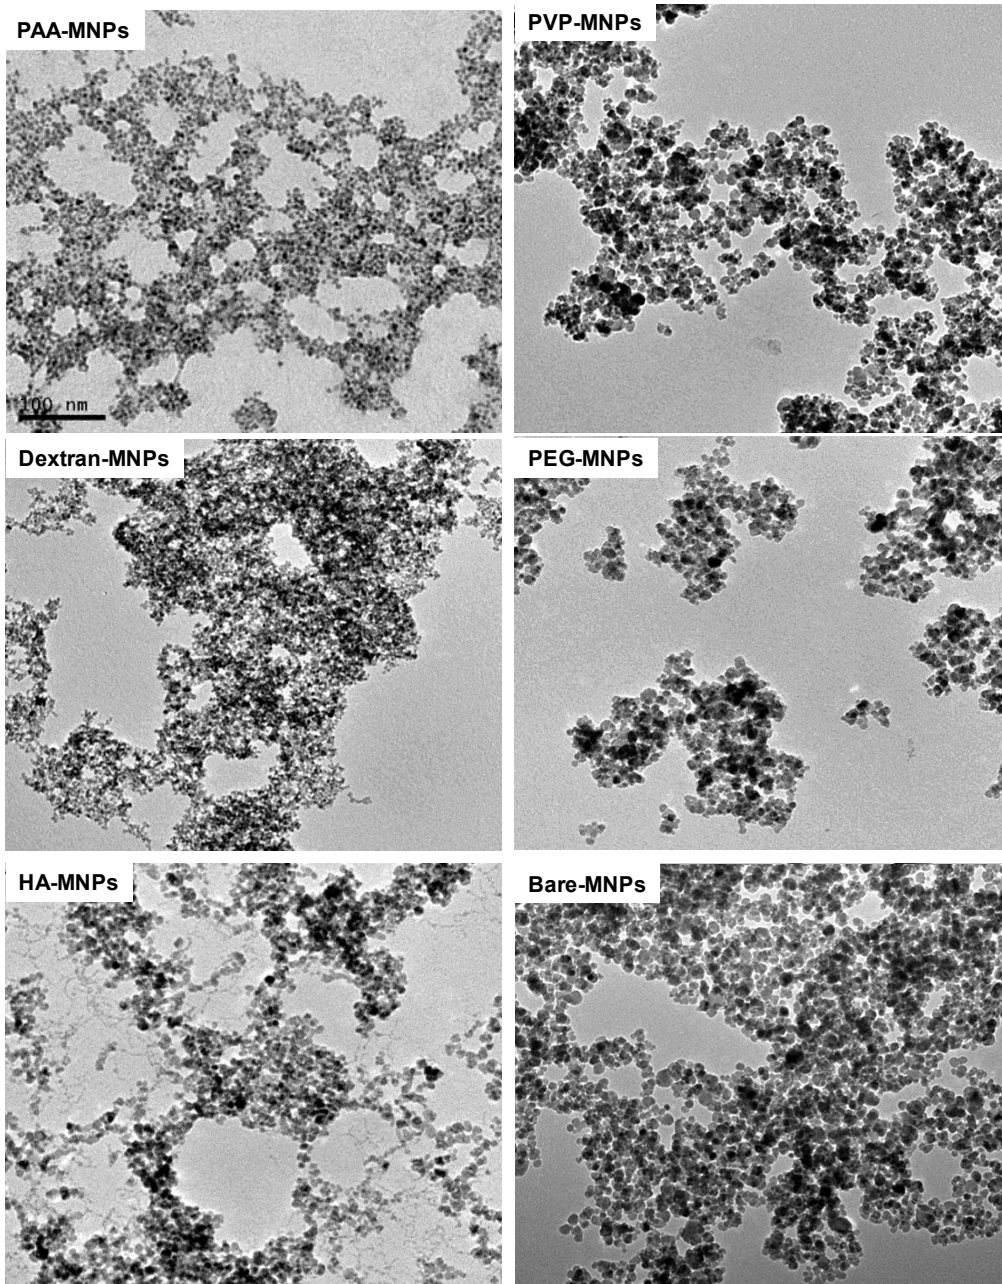

**Figure S1.** TEM images of the different as-prepared MNPs at 150 k magnification.

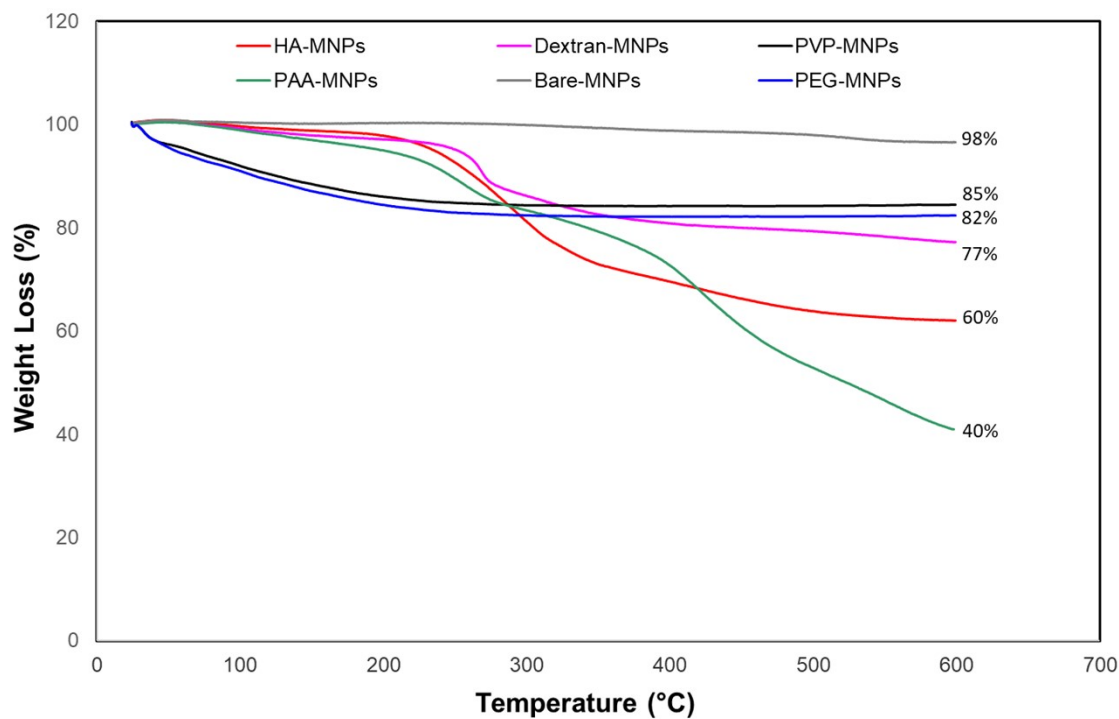

**Figure S2.** TGA curves for the different MNPs. A total weight loss of 85, 82, 77, 60, and 40% was observed for PVP, PEG, Dextran, HA, and PAA-coated MNPs respectively. It is clearly evident that the grafting of polymers on MNPs was effectively achieved with the lowest surface coating observed for PEG and PVP-MNPs and the highest for PAA-MNPs.

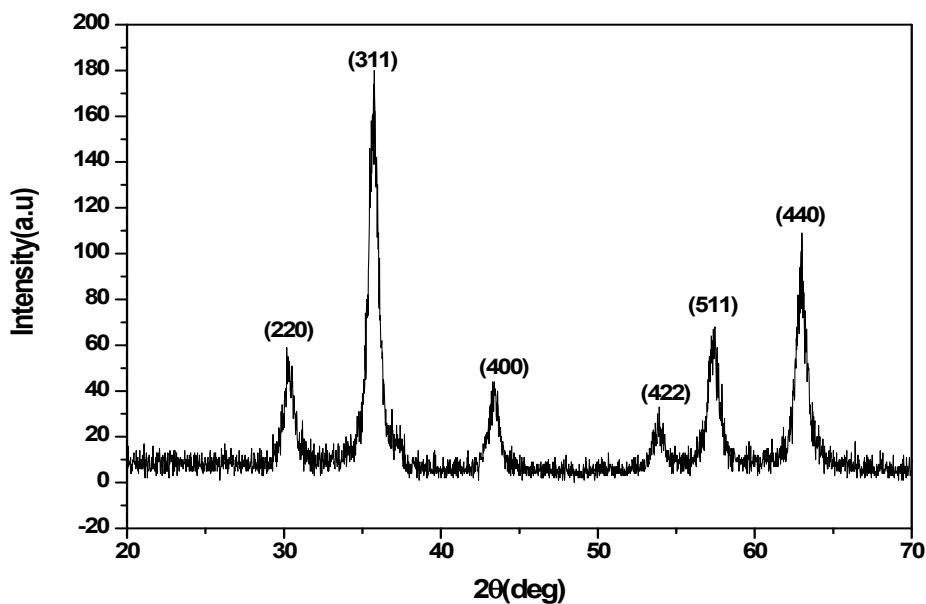

**Figure S3.** Representative powder XRD of PVP-MNPs with the observed diffraction peaks indicating that the MNPs are magnetite ( $\text{Fe}_3\text{O}_4$ ).

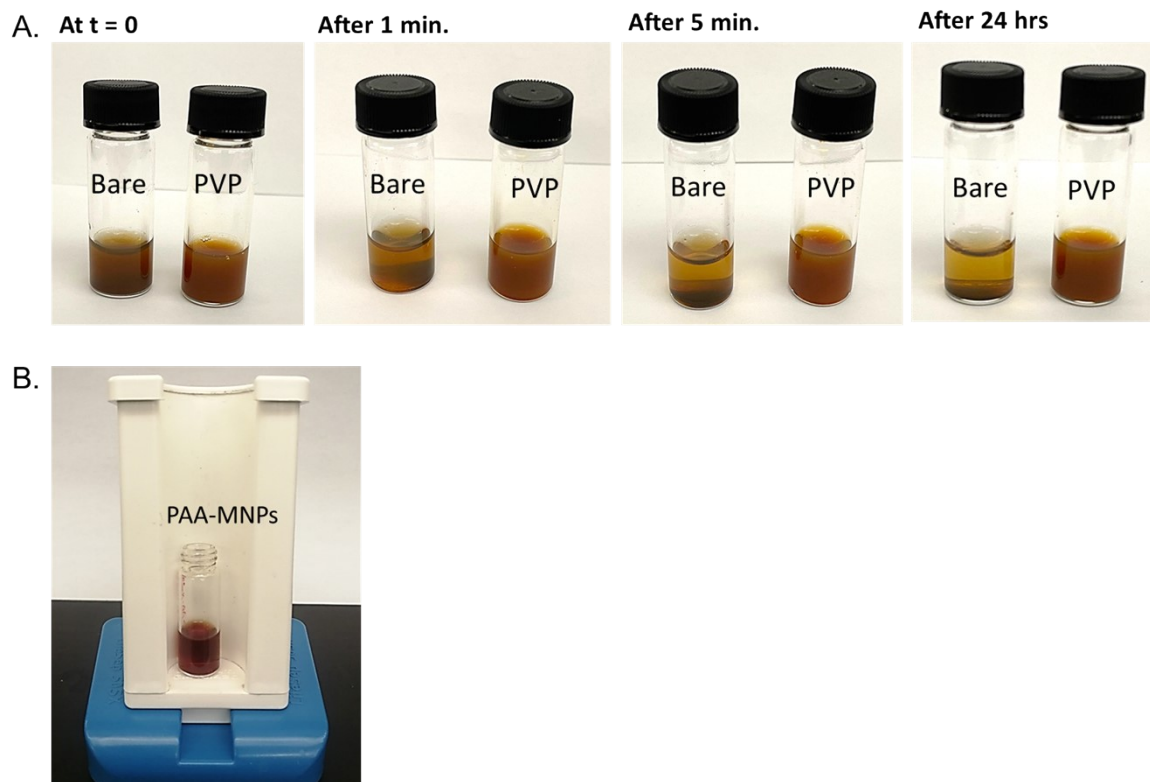

**Figure S4.** A) Real-time optical photographs of uncoated bare-MNPs and PVP-MNPs clearly showing the fast precipitation of uncoated MNPs and the excellent aqueous dispersity of PVP-MNPs due to the PVP coating. B) Optical photograph of PAA-MNPs showing the ferrofluidic behavior when subjected to external hand-held magnet. No precipitation on the walls of the magnet is observed even after a long time.

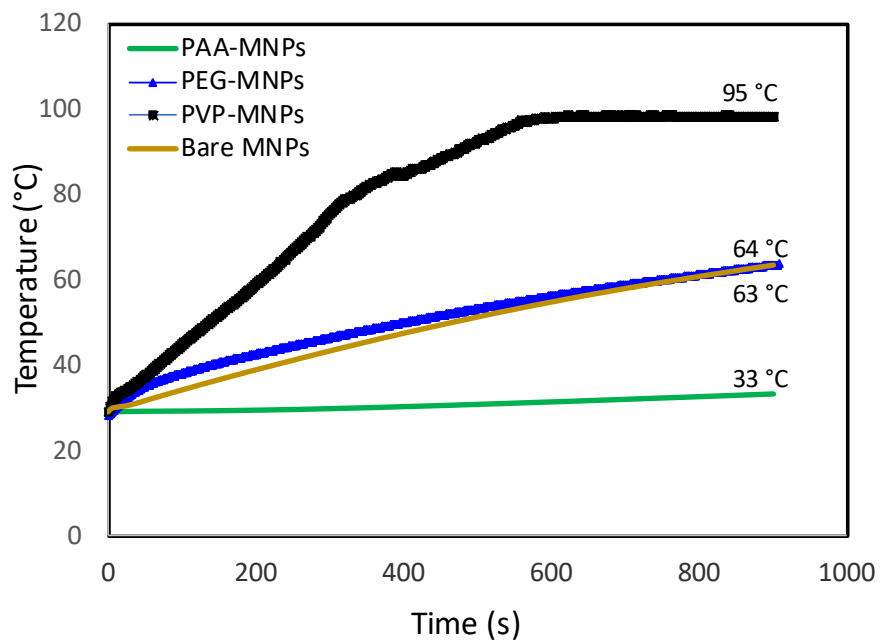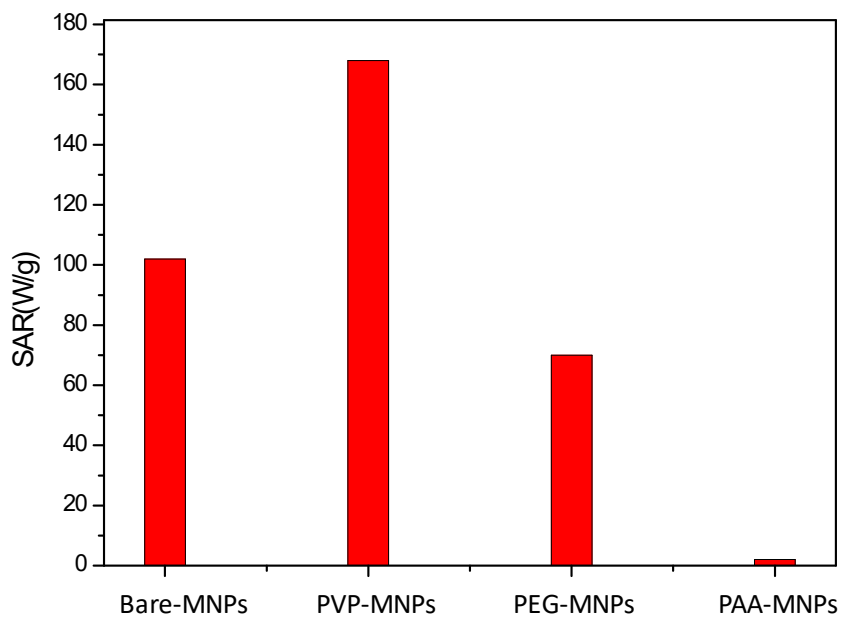

**Figure S5.** A) Hyperthermia temperature increase vs time plots for aqueous dispersions of PMNPs (10 mg/mL) along with their corresponding SAR values ( $H_0 = 170$  Oe and  $f = 332.8$  kHz).

## Characterization of Dox@PMNPs:

A.

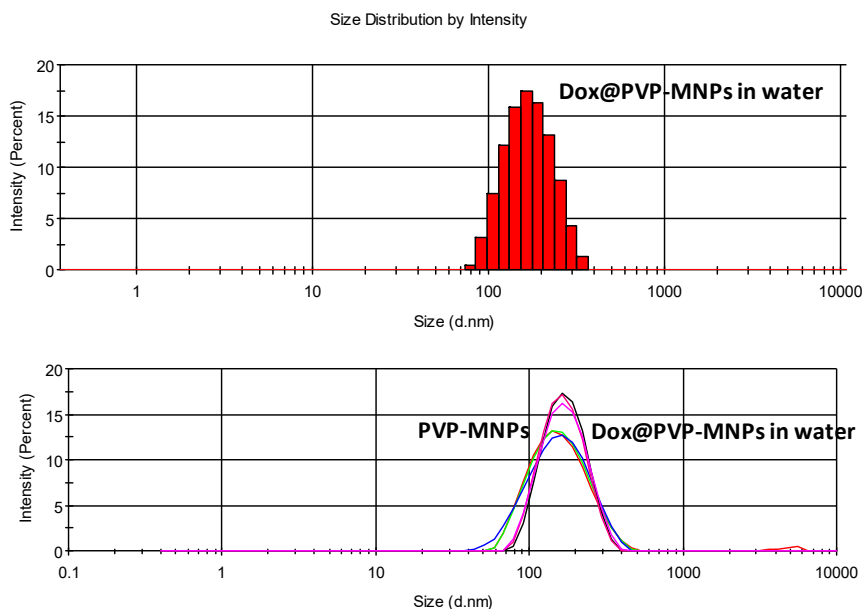

B.

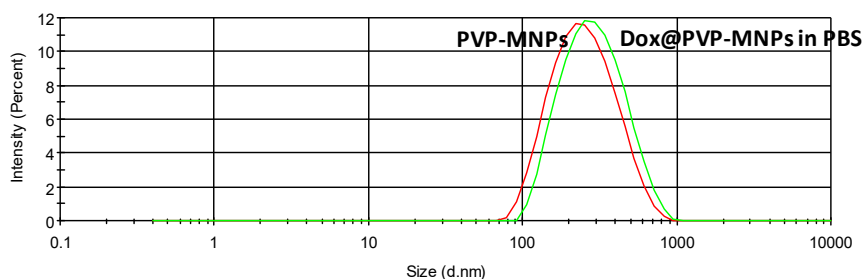

C.

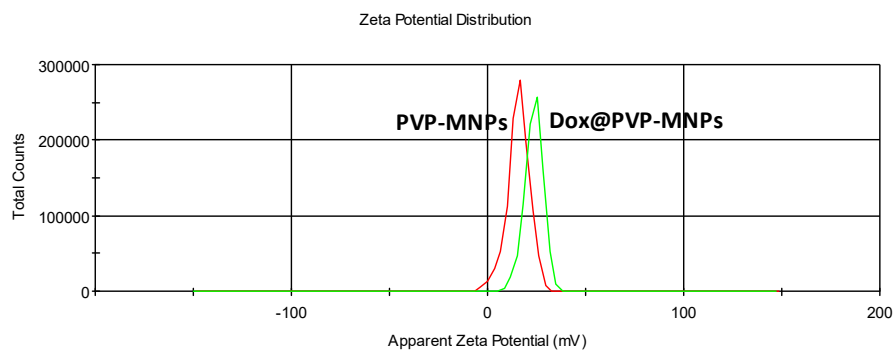

**Figure S6.** DLS measurements of Dox@PVP-MNPs in water and PBS. A) Hydrodynamic size ( $D_H$ ) distribution of Dox@PVP-MNPs in water along with a comparison between Dox@PVP-MNPs ( $D_H = 155 \pm 1.31$  nm; PDI = 0.09) and PVP-MNPs ( $D_H = 145 \pm 1.99$  nm; PDI = 0.15). B) Size distribution of Dox@PVP-MNPs in PBS buffer ( $D_H = 318 \pm 10.90$  nm; PDI = 0.323) along with PVP-MNPs in PBS ( $D_H = 307 \pm 11.66$  nm; PDI = 0.261). C) Representative zeta potential ( $\xi$ ) measurements of Dox@PVP-MNPs ( $\xi = +15.5 \pm 0.99$  mV) and PVP-MNPs in water ( $\xi = +10.5 \pm 1.54$  mV). Three independent measurements for three different concentrations were conducted reported as average means  $\pm$  Std. Dev.



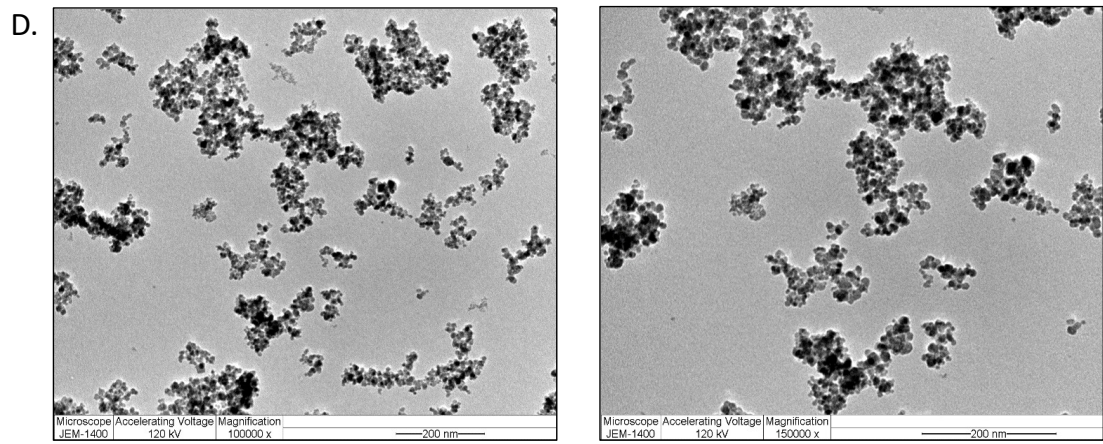

**Figure S6.** D) TEM images of an aqueous dispersion of Dox@PVP-MNPs at two different magnifications.

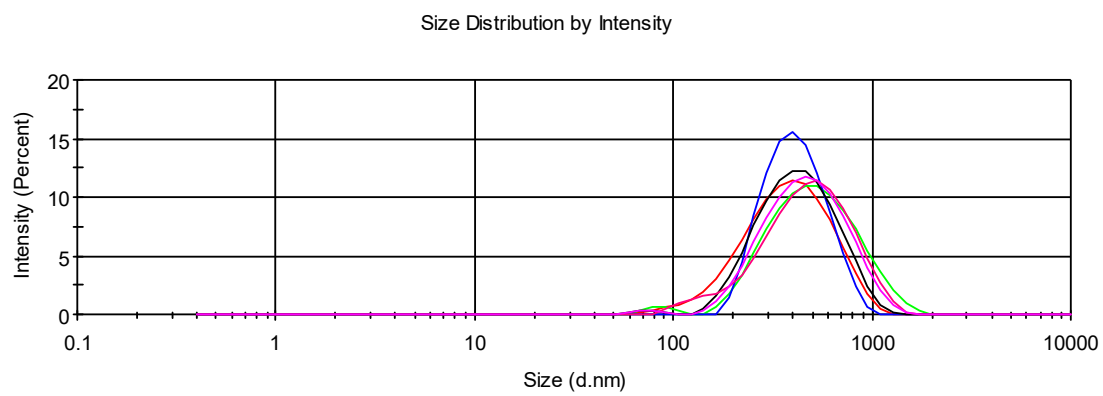

**Figure S7.** DLS size distribution of PVP-MNPs in PBS buffer monitored over a week.

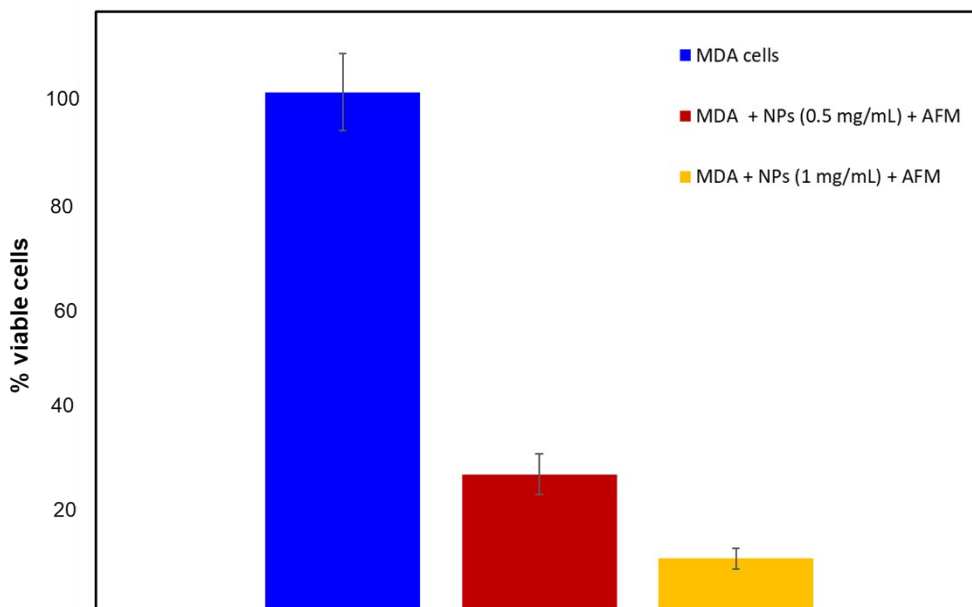

**Figure S8.** MTT cell viability assay for PVP-MNPs (0.5 mg/mL and 1 mg/mL) treated MDA-MB-231 metastatic breast cancer cells followed by the application of AMF (170 Oe and 332.8 kHz). The experiments were carried out in triplicates and error bars denote standard deviations.

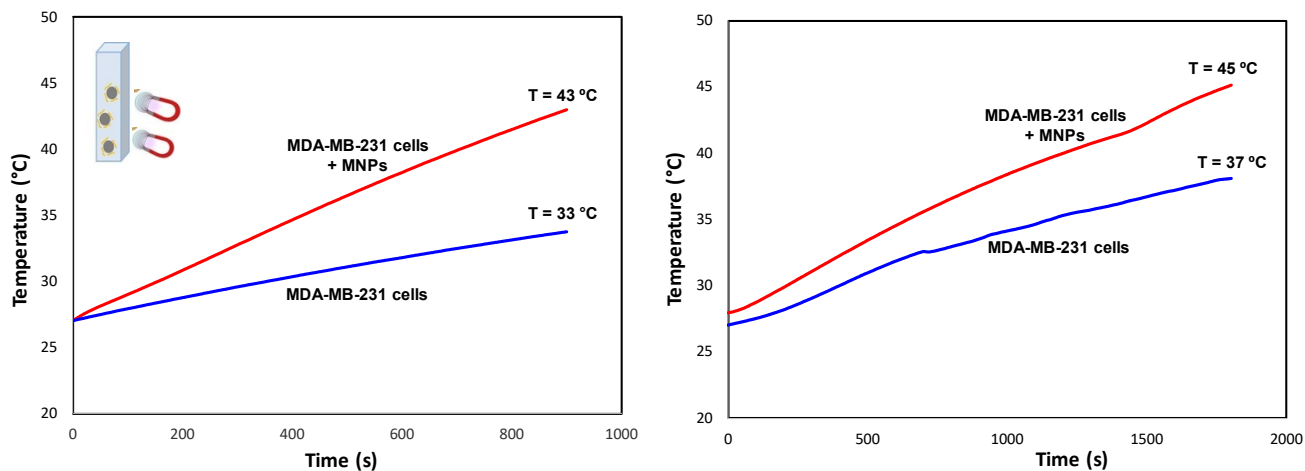

**Figure S9.** Representative plots of temperature increase vs time for PVP-MNPs (same trend for Dox@PVP-MNPs) treated with MDA-MB-231 metastatic breast cancer cells followed by the application of AMF (170 Oe and 332.8 kHz) for (left) 15 or (right) 30 minutes.
